# Increased generalized anxiety, depression and distress during the COVID-19 pandemic: a cross-sectional study in Germany

**Alexander Bäuerle, Martin Teufel, Venja Musche, Benjamin Weismüller, Hannah Kohler, Madeleine Hetkamp, Nora Dörrie, Adam Schweda, Eva-Maria Skoda**

University of Duisburg-Essen, Clinic for Psychosomatic Medicine and Psychotherapy, LVR University Hospital Essen, 45147 Essen, Germany  
Address correspondence to Martin Teufel, E-mail: martin.teufel@uni-due.de

## ABSTRACT

**Background** Since the first cases of the novel coronavirus disease SARS-CoV-2 were reported in December 2019 in China, the virus has spread in most countries. The aim of the present study was to assess initial data on the mental health burden of the German public during the COVID-19 pandemic.

**Methods** A cross-sectional study was conducted in Germany and collected complete datasets from 15 704 German residents aged 18 years and over. Besides demographics, generalized anxiety (GAD-7), depression (PHQ-2) and psychological distress (DT) were assessed. Furthermore, COVID-19-related fear, trust in governmental actions to face COVID-19 and the subjective level of information regarding COVID-19 were covered.

**Results** Significantly increased symptoms were highly prevalent in all dimensions: generalized anxiety (44.9%), depression (14.3%), psychological distress (65.2%) and COVID-19-related fear (59%). Females and younger people reported higher mental burden. Trust in governmental actions to face COVID-19 and the subjective level of information regarding COVID-19 are negatively associated with mental health burden. However, the subjective level of information regarding COVID-19 is positively associated with increased COVID-19-related fear.

**Conclusions** The provision of appropriate psychological interventions for those in need and the provision of transparency and comprehensible information are crucial during the current pandemic.

**Keywords** COVID-19, COVID-19-related fear, depression, generalized anxiety, mental health

## Introduction

In December 2019, the first cases of the novel coronavirus disease SARS-CoV-2 (COVID-19) were reported in Wuhan, China.<sup>1</sup> Since then, the virus rapidly spread across South East Asia and reached Central Europe, and nowadays infections are reported in almost all countries of the world.<sup>2</sup> In March 2020, the World Health Organization officially classified the spread of the virus as the first pandemic since H1N1 in 2009/2010 with now over 7.8 million reported infections.<sup>2,3</sup> So far, little is known about medications and vaccinations to effectively combat the virus<sup>4</sup>. Therefore, current priorities to face the pandemic lie on actions to slow down the spread of the virus.

These highly necessary actions ‘to flatten the curve’ are in most countries restrictive and thus a limitation to personal lives. In Germany, public facilities, educational institutions

and borders to the neighboring countries were closed to prevent the emergence of infection chains. Furthermore, imposed contact prohibitions to enforce physical distancing and private quarantine affect most people in the country. However, these highly urgent measures to slow down the spread of the virus in order to prevent new infections have

Alexander Bäuerle, Deputy Head of Research

Martin Teufel, Director

Venja Musche, Researcher

Benjamin Weismüller, Researcher

Hannah Kohler, Researcher

Madeleine Hetkamp, Researcher

Nora Dörrie, Head of the Outpatient Clinic

Adam Schweda, Researcher

Eva-Maria Skoda, Head of Research

an enormous impact on the economy, public life and on each individual.

A recent review investigating the psychological burden caused by quarantine highlights the psychological strain on those who are not allowed to participate in social life.<sup>5</sup> The current literature on COVID-19 offers a wide range of different aspects of the pandemic, especially regarding the impact of the virus on people with chronic physical diseases.<sup>6–8</sup> In contrast, high-quality data concerning mental health issues in times of COVID-19 are still needed.<sup>9,10</sup> Already existing research focuses on mental health issues of frontline medical staff in China,<sup>11,12</sup> the impact of constant media coverage and its influence on peoples' mental health<sup>13,14</sup> and the change of the psychological burden over the course of time during the pandemic.<sup>15</sup> One recently published study investigates the impact of the COVID-19 pandemic on the mental health burden of the Chinese public.<sup>16</sup> More specific, this study shows high prevalence of generalized anxiety (35.1%), depression symptoms (20.1%) and poor sleep quality (18.2%) during the COVID-19 pandemic. It is worth noting that most research on mental health issues in times of COVID-19 is derived from Chinese samples and should be interpreted with caution when compared to Western populations. Given these circumstances, there is a strong need to collect high-quality data on the impact of the COVID-19 pandemic on the mental health of the Western population. Additionally, a recently published *Lancet Psychiatry* position paper highlighted this matter of public interest.<sup>17</sup> Therefore, the proposed study aims to fill this research gap.

The primary objective of the present study is to investigate the mental health burden of the German population during the COVID-19 pandemic. Subsequently, it is hypothesized that generalized anxiety symptoms, depression symptoms, psychological distress and COVID-19-related fear are increased. The secondary objectives refer to relations between peoples' trust in governmental actions to face COVID-19, the subjective level of information regarding COVID-19 and peoples' mental health burden. It is hypothesized that high level of trust in governmental actions to face COVID-19 and high subjective level of information regarding COVID-19 correlate negatively with generalized anxiety symptoms, depression symptoms, psychological distress and COVID-19-related fear.

The results of this study will provide important data on the mental health of the German population and on various factors related to mental health issues during the COVID-19 pandemic. Such data is relevant in order to build much needed evidence on current mental health issues and to provide important information regarding the need for targeted interventions to support the German public.

## Methods

### Study design and participants

Over the course of 8 weeks (10 March–5 May 2020), a cross-sectional online survey was distributed via online channels (e.g., online newspaper), social media and print media. The survey period covers different levels of governmental restrictions and their easing of those restrictions in public life in Germany.

The survey was accessed 18 895 times with a total of 15 704 participants completing the survey (83% completion rate). At the time of survey completion, a total of 15 037 respondents were residing in Germany and were at least 18 years old. [Table 1](#) shows a summarized overview of the demographics included in the analysis. Of the 15 037 respondents included in this sample, 10 633 (70.7%) were female, 4353 (28.9%) were male and 51 (0.3%) were gender queer. 2076 (13.8%) of the participants were aged 18–24 years, 3725 (24.8%) were aged 25–34 years, 3 459 (23.0%) were aged 35–44 years, 2846 (18.9%) were aged 45–54 years, 2151 (14.3%) were aged 55–64 years and 780 (5.2%) were aged 65 years or older.

### Ethics

Electronic informed consent was obtained prior to the start of the survey. Participation was voluntary, anonymous, and participants could withdraw from the study at any time. The proposed study was conducted in accordance with the Declaration of Helsinki, and the Ethics Committee of the University Hospitals Essen has approved the execution of the study (20-9307-BO).

### Measures

The completion of the survey requires about 12 minutes. The survey consists of several modules, including demographic data, e.g., gender, age, marital status, having a child below the age of 18, educational level and occupational status.

Three validated measures were used in the survey to assess mental health burden, namely, Generalized Anxiety Disorder Scale-7 (GAD-7),<sup>17</sup> Patient Health Questionnaire-2 (PHQ-2),<sup>18</sup> and Distress Thermometer (DT).<sup>19</sup> The GAD-7 consists of seven items assessing the frequency of anxiety symptoms over the past 2 weeks on a 4-point Likert scale (0 = never to 3 = nearly every day). According to previous validation samples, sum scores of  $\geq 5$ ,  $\geq 10$  and  $\geq 15$  indicate mild, moderate and severe generalized anxiety symptoms.<sup>18</sup> The PHQ-2 consists of two items screening the frequency of depression symptoms over the past 2 weeks on a 4-point Likert scale (0 = never to 3 = nearly every day). A sum score of  $\geq 3$  points to major depression symptoms.<sup>19</sup> The

**Table 1** Demographic characteristics

|                                         | N      | %     |
|-----------------------------------------|--------|-------|
| <b>Sex</b>                              |        |       |
| Female                                  | 10 633 | 70.7  |
| Male                                    | 4353   | 28.9  |
| Inter/diverse                           | 51     | 0.3   |
| <b>Age</b>                              |        |       |
| 18–24 years                             | 2076   | 13.8  |
| 25–34 years                             | 3725   | 24.8  |
| 35–44 years                             | 3459   | 23.0  |
| 45–54 years                             | 2846   | 18.9  |
| 55–64 years                             | 2151   | 14.3  |
| 65–74 years                             | 662    | 4.4   |
| ≥75 years                               | 118    | 0.8   |
| <b>Marital status</b>                   |        |       |
| Single                                  | 4300   | 28.6  |
| Married                                 | 6391   | 42.5  |
| In a relationship                       | 3129   | 20.8  |
| Divorced/separated                      | 922    | 6.1   |
| Widowed                                 | 197    | 1.3   |
| Other                                   | 98     | 0.7   |
| <b>Children</b>                         |        |       |
| Yes                                     | 4281   | 28.5  |
| No                                      | 10 756 | 71.5  |
| <b>Educational level</b>                |        |       |
| University education                    | 6403   | 42.6  |
| Higher education entrance qualification | 4921   | 32.7  |
| Secondary education                     | 2767   | 18.4  |
| Lower secondary education               | 655    | 4.4   |
| No qualification                        | 47     | 0.3   |
| Other                                   | 244    | 1.6   |
| <b>City size (population)</b>           |        |       |
| 100 00 residents                        | 8396   | 55.8  |
| 20 000 residents                        | 3417   | 22.7  |
| 5000 residents                          | 1645   | 10.9  |
| <5000 residents                         | 1 579  | 10.5  |
| <b>Occupation</b>                       |        |       |
| Not employed                            | 1544   | 10.3  |
| Healthcare-related job                  | 2159   | 14.6  |
| Other                                   | 11 298 | 75.1  |
| <b>Illnesses</b>                        |        |       |
| Yes                                     | 5553   | 36.9  |
| No                                      | 9484   | 63.1  |
| Total                                   | 15 037 | 100.0 |

DT involves one visual analogue scale 0 = no distress to 10 = extreme distress experienced in the past week. Here, a score  $\geq 4$  indicates elevated psychological distress.<sup>20</sup> All

instruments were previously validated within the German population and are commonly used in clinical and scientific practice. Furthermore, one item assessing COVID-19-related fear on a 7-point Likert-scale (1 = very low to 7 = extremely high) was implemented.

*Trust in governmental actions to face COVID-19* (I think Germany is well prepared to face COVID-19; I think all government measures are being taken to combat COVID-19; I have confidence in the governmental system in Germany) and the *subjective level of information regarding COVID-19* (I feel informed about COVID-19; I feel informed about measures to avoid an infection with COVID-19; I understand the health authorities' advice regarding COVID-19) were assessed using a 7-point Likert-scale (1 = complete disagreement to 7 = complete agreement). The reliability for both scales was tested using Cronbach's  $\alpha$  as an indication of internal consistency. The scales trust in governmental actions to face COVID-19 and subjective level of information regarding COVID-19 showed high internal consistency with Cronbach's  $\alpha = 0.825$  and Cronbach's  $\alpha = 0.801$ . The scale-scale correlation was  $r = 0.464$ ,  $P < 0.001$ .

### Statistical analysis

The data analysis was performed using SPSS Statistics 26 Software (IBM, Armonk, NY). First, sum scores for the GAD-7 and PHQ-2 and mean scores for the two scales were calculated. Descriptive statistics were conducted for characteristics of participants including socio-demographics and scores of psychometric tools. Considering the present sample size, a normal distribution of the variables was assumed, and *Pearson* correlations have been conducted. The level of significance was set at  $\alpha = 0.05$  (two-sided tests).

## Results

### Prevalence of generalized anxiety symptoms, depression symptoms, psychological distress and COVID-19-related fear

The prevalence of general anxiety symptoms, depression symptoms, psychological distress and COVID-19-related fear, stratified by gender and age, is shown in Tables 2 and 3. Overall prevalence for elevated general anxiety symptoms (sum scores of  $\geq 5$ ) was reported from 44.9% ( $N = 6748$ ) of the participants. Almost one-third (28.1%,  $N = 4226$ ) of the respondents reached a sum score of  $\geq 5$ . Moreover 9.8% ( $N = 1476$ ) and 7% ( $N = 1046$ ) reached a sum score of  $\geq 10$  and  $\geq 15$ , respectively. Sum scores for depression symptoms of  $\geq 3$  were reported from 14.3% ( $N = 2157$ ). A score of  $\geq 4$  for experienced psychological distress was reported from 65.2% ( $N = 9799$ ) of the respondents. Participants

**Table 2** Prevalence of generalized anxiety symptoms, depression symptoms, psychological distress and COVID-19-related fear stratified by gender

|                              | Total          | Sex                 |                 |                        |
|------------------------------|----------------|---------------------|-----------------|------------------------|
|                              | (N = 15 037)   | Female (N = 10 633) | Male (N = 4353) | Inter/diverse (N = 51) |
| <b>GAD-7</b>                 |                |                     |                 |                        |
| <5                           | 8289 (55.1%)   | 5413 (50.9%)        | 2853 (65.5%)    | 23 (45.1%)             |
| ≥5                           | 4226 (28.1%)   | 3173 (29.8%)        | 1037 (23.8%)    | 16 (31.4%)             |
| ≥10                          | 1476 (9.6%)    | 1199 (11.3%)        | 272 (6.2%)      | 5 (9.8%)               |
| ≥15                          | 1046 (7.0%)    | 848 (8.0%)          | 191 (4.4%)      | 7 (13.7%)              |
| <b>PHQ-2</b>                 |                |                     |                 |                        |
| <3                           | 12 880 (85.7%) | 9025 (84.9%)        | 3822 (87.8%)    | 33 (64.7%)             |
| ≥3                           | 2157 (14.3%)   | 1608 (15.1%)        | 531 (12.2%)     | 18 (35.3%)             |
| <b>DT</b>                    |                |                     |                 |                        |
| <4                           | 5238 (34.8%)   | 3423 (32.2%)        | 1797 (41.3%)    | 18 (35.3%)             |
| ≥4                           | 9799 (65.2%)   | 7210 (67.8%)        | 2556 (58.7%)    | 33 (64.7%)             |
| <b>COVID-19-related fear</b> |                |                     |                 |                        |
| <5                           | 6170 (41.0%)   | 3942 (37.1%)        | 2199 (50.5%)    | 29 (56.9%)             |
| ≥5                           | 8867 (59.0%)   | 6691 (62.9%)        | 2154 (49.5%)    | 22 (43.1%)             |

Note: GAD-7 = Generalized Anxiety Disorder Scale-7, sum scores of  $\geq 5$ ,  $\geq 10$  and  $\geq 15$  indicate mild, moderate and severe generalized anxiety symptoms, respectively; PHQ-2 = Patient Health Questionnaire-2, sum scores of  $\geq 3$  indicate major depression symptoms; DT = Distress Thermometer, a score  $\geq 4$  indicates elevated psychological distress. COVID-19-related fear,  $\geq 5$  indicate elevated COVID-19-related fear.

COVID-19-related fear were studied using a 7-point Likert scale, while scores between 5 and 7 indicate elevated COVID-19-related fear. More respondents (59%,  $N = 8867$ ) reported to have heightened COVID-19-related fear.

### Associations of trust in governmental actions to face COVID-19 and subjective level of information regarding COVID-19 with mental health parameters

Participants' trust in governmental actions to face COVID-19 and subjective level of information regarding COVID-19 were studied using 7-point Likert scales. Each scale consists of three items. Almost half of the participants reported high trust in governmental actions to face COVID-19, and most participants felt well informed regarding COVID-19 (scores between 5 and 7), 48.2 and 90.4%, respectively. Considering trust in governmental actions to face COVID-19, we found significant negative correlations between generalized anxiety symptoms ( $r = -0.153$ ,  $P < 0.001$ ), depression symptoms ( $r = -0.117$ ,  $P < 0.001$ ) and psychological distress ( $r = -0.154$ ,  $P < 0.001$ ). No significant correlation between trust in governmental actions to face COVID-19 and COVID-19-related fear ( $r = -0.013$ ,  $P = 0.104$ ) was observed. Significant negative correlations between the sub-

jective level of information regarding COVID-19 and generalized anxiety symptoms ( $r = -0.102$ ,  $P < 0.001$ ), depression symptoms ( $r = -0.096$ ,  $P < 0.001$ ) and psychological distress ( $r = -0.097$ ,  $P < 0.001$ ) were observed. Furthermore, a positive correlation between the subjective level of information regarding COVID-19 and COVID-19-related fear was observed ( $r = 0.107$ ,  $P < 0.001$ ).

## Discussion

### Main finding of this study

The present study is assessing the mental health burden during the COVID-19 pandemic in Germany. This study shows high prevalence of generalized anxiety symptoms, depression symptoms, psychological distress and COVID-19-related fear. Furthermore, trust in governmental actions to face COVID-19 and the subjective level of information regarding COVID-19 were negatively associated with generalized anxiety symptoms, depression symptoms and psychological distress. In contrast, trust in governmental actions to face COVID-19 is not associated with COVID-19-related fear, but the subjective level of information regarding COVID-19 is positively associated with COVID-19-related fear.

**Table 3** Prevalence of generalized anxiety symptoms, depression symptoms, psychological distress and COVID-19-related fear stratified by age

|                              | Total<br>(N = 15 037) | Age—categories in years |                     |                     |                     |                     |                    |               |
|------------------------------|-----------------------|-------------------------|---------------------|---------------------|---------------------|---------------------|--------------------|---------------|
|                              |                       | 18–24<br>(N = 2076)     | 25–34<br>(N = 3725) | 35–44<br>(N = 3459) | 45–54<br>(N = 2846) | 55–64<br>(N = 2151) | 65–74<br>(N = 662) | ≥75 (N = 118) |
| <b>GAD-7</b>                 |                       |                         |                     |                     |                     |                     |                    |               |
| <5                           | 8289 (55.1%)          | 915 (44.1%)             | 2045 (54.9%)        | 1836 (53.1%)        | 1645 (57.8%)        | 1306 (60.7%)        | 461 (69.6%)        | 81 (68.7%)    |
| ≥5                           | 4226 (28.1%)          | 618 (29.8%)             | 1026 (27.5%)        | 1035 (29.9%)        | 772 (27.1%)         | 593 (27.6%)         | 154 (23.3%)        | 28 (23.7%)    |
| ≥10                          | 1476 (9.8%)           | 307 (14.8%)             | 377 (10.1%)         | 347 (10.0%)         | 262 (9.2%)          | 147 (6.8%)          | 29 (4.4%)          | 7 (5.9%)      |
| ≥15                          | 1046 (7.0%)           | 236 (11.4%)             | 277 (7.4%)          | 241 (7.0%)          | 167 (5.9%)          | 105 (4.9%)          | 18 (2.7%)          | 2 (1.7%)      |
| <b>PHQ-2</b>                 |                       |                         |                     |                     |                     |                     |                    |               |
| <3                           | 12 880 (85.7%)        | 1 529 (73.7%)           | 3 202 (86.0%)       | 3 005 (86.9%)       | 2 520 (88.5%)       | 1 912 (88.9%)       | 606 (91.5%)        | 106 (89.8%)   |
| ≥3                           | 2 157 (14.3%)         | 547 (26.3%)             | 523 (14.0%)         | 454 (13.1%)         | 326 (11.5%)         | 239 (11.1%)         | 56 (8.5%)          | 12 (10.2%)    |
| <b>DT</b>                    |                       |                         |                     |                     |                     |                     |                    |               |
| <4                           | 5 238 (34.8%)         | 676 (32.6%)             | 1282 (34.4%)        | 1024 (29.6%)        | 986 (34.6%)         | 831 (38.6%)         | 367 (55.4%)        | 72 (61.0%)    |
| ≥4                           | 9799 (65.2%)          | 1400 (67.4%)            | 2443 (65.6%)        | 2435 (70.4%)        | 1860 (65.4%)        | 1320 (61.4%)        | 295 (44.6%)        | 46 (39.0%)    |
| <b>COVID-19-related fear</b> |                       |                         |                     |                     |                     |                     |                    |               |
| <5                           | 6170 (41.0%)          | 930 (44.8%)             | 1709 (45.9%)        | 1348 (39.0%)        | 1115 (39.2%)        | 795 (37.0%)         | 232 (35.0%)        | 41 (34.7%)    |
| ≥5                           | 8867 (59.0%)          | 1146 (55.2%)            | 2016 (54.1%)        | 2111 (61.0%)        | 1731 (60.8%)        | 1356 (63.0%)        | 430 (65.0%)        | 77 (65.3%)    |

Note: GAD-7 = Generalized Anxiety Disorder Scale-7, sum scores of  $\geq 5$ ,  $\geq 10$  and  $\geq 15$  indicate mild, moderate and severe generalized anxiety symptoms, respectively; PHQ-2 = Patient Health Questionnaire-2, sum scores of  $\geq 3$  indicate major depression symptoms; DT = Distress Thermometer, a score  $\geq 4$  indicates elevated psychological distress. COVID-19-related fear,  $\geq 5$  indicate elevated COVID-19-related fear.

The prevalence of at least mild generalized anxiety symptoms was 44.9% within the investigated sample. 16.8% of the current sample had moderate generalized anxiety symptoms, which is strongly increased compared to previously published studies in Germany with 6.0 and 5.9% prevalence of moderate anxiety symptoms, respectively.<sup>18,21</sup> In fact, moderate anxiety symptoms (GAD-7 score of  $\geq 10$ ) were associated with a positive likelihood ratio for the presence of a generalized anxiety disorder of 5.1.<sup>22</sup> Moreover, severe generalized anxiety symptoms (GAD-7 score  $\geq 15$ ) were observed in 7% of the respondents. Compared to the normative sample (1%) and a new population-based study (1.2%), the prevalence of severe generalized anxiety symptoms is seven times higher.<sup>18,21</sup> Applying a cut-off score of  $\geq 9$ , which was used in a recently published study in China, the German population shows a much lower prevalence of generalized anxiety symptoms than the Chinese population in times of COVID-19 (20 vs. 35.1%).<sup>16</sup> These results underline the importance of high-quality data from different populations to assess the impact of COVID-19 on the mental health in different countries. One explanation for these differences could be the significantly lower number of deaths caused by COVID-19 in Germany compared to China.<sup>2</sup> In addition, cultural peculiarities as well as available information on COVID-19 and its consequences

may explain the different prevalence of generalized anxiety symptoms.

Compared to representative German samples, increased prevalence of depression symptoms (14.3 vs. 5.6%) as well as psychological distress (65.2 vs. 39%) was observed.<sup>20,23</sup> Additionally, more than half (59%) of the respondents reported elevated COVID-19-related fear. Considering the heightened prevalence, it is clear to say that the mental health burden is increased in the German public during the COVID-19 pandemic. Elevated generalized anxiety symptoms, depression symptoms and psychological distress were more likely to occur in females and younger people, which is consistent to existing literature regarding the prevalence of mental health burden in Germany.<sup>18–20</sup> In contrast, existing literature on the mental health burden in China during the COVID-19 outbreak, where similar psychometric instruments were used, no difference between genders could be observed, but younger people also reported more anxiety symptoms.<sup>16</sup>

Correlation analyses were carried out to assess whether a high level of trust in governmental actions to face COVID-19 and a high subjective level of information regarding COVID-19 are associated with reduced mental health burden. Less than half (48.2%) of our sample reported high trust in the government's actions to combat COVID-19,

and 90.4% felt well informed about COVID-19. Trust in governmental actions to face COVID-19 and the subjective level of information regarding COVID-19 were negatively associated with generalized anxiety symptoms, depression symptoms and psychological distress. These findings are consistent with previous published findings on the impact of governmental statements on mental health during the COVID-19 pandemic.<sup>15</sup> This points to the inevitable need and responsibility for the government and the media to provide clear and comprehensible information to the public.<sup>13,14</sup> No association between trust in governmental actions to face COVID-19 and COVID-19-related fear could be observed. Moreover, a positive correlation between the subjective level of information regarding COVID-19 and COVID-19-related fear occurred. This suggests that people who feel well informed about COVID-19 have an increased COVID-19-related fear. One possible explanation could be that COVID-19-related fear is not an anxiety in the pathological sense, but a more rational response that can be explained by the growing number of infection cases in the world. In-line with this, previous research suggested that a heightened frequency of risk-elevating news during the Ebola virus disease might contribute to public concerns in relations to infectious diseases.<sup>24</sup>

### What is already known on this topic

Recently published literature on the psychological impact caused by the COVID-19 pandemic on people's mental health has shown increased depression and anxiety symptoms, poor sleep quality and distress.<sup>9,11,12,16</sup> Especially frontline medical staff in China report poor mental health during the ongoing pandemic.<sup>11,12</sup> A longitudinal study conducted in China revealed that the perceived psychological impact on mental health persists up to 1 month after the outbreak of the virus.<sup>25</sup> Still most of the studies investigating the mental health burden during the COVID-19 pandemic are derived from Asian samples.

### What this study adds

This study offers first data on the mental health burden of the German public during the ongoing COVID-19 pandemic. The data suggest that the observed increased prevalence of generalized anxiety symptoms, depression symptoms and psychological distress in the German population is related to the ongoing pandemic and its consequences for the public. Therefore, appropriate interventions are crucial to support burdened people and prevent manifestations of mental illnesses. Such interventions should be implemented in public health strategies.<sup>26</sup> During the current pandemic, low-

threshold tele-medical approaches offer great advantages in providing anonymous and effective support to many people.<sup>27</sup> Nevertheless, already existing e-mental health approaches to support burdened people in times of COVID-19 need to be further evaluated.<sup>28</sup>

The main strength of this study is that it is one of the largest to date to assess the mental health aspects of people during the COVID-19 pandemic in the Western hemisphere. In fact, this is the first study so far addressing the mental health issues in Germany during the COVID-19 pandemic. Furthermore, the completion rate (83%) is high when compared with the average completion rates in online survey studies.<sup>29</sup> This reflects the public interest in mental health during the COVID-19 pandemic.

### Limitations of this study

However, limitations need to be considered. The data are driven from a cross-sectional study design. Therefore, it is inappropriate to draw causal conclusions from the data. In addition, an online survey was used to collect the data, which was distributed via online and analogue channels. Thus, the possibility of selection bias should be considered. It is important to note that two scales, namely, trust in governmental actions to face COVID-19 and the subjective level of information regarding COVID-19, could not be validated beforehand. Nevertheless, post hoc validation of the established scales showed high internal consistency.

### Conclusion

To conclude, the results of this study suggest a high prevalence of generalized anxiety symptoms, depression symptoms, psychological distress and COVID-19-related fear during the ongoing pandemic in Germany. Despite significantly increased prevalence of generalized anxiety symptoms in the German population, data on anxiety symptoms in the Chinese population appear to be even more elevated. High trust in governmental actions to face COVID-19 and a highly subjective level of information regarding COVID-19 are associated with low mental health burden. Therefore, maintaining trust in governmental actions to face COVID-19 as well as providing transparency and understandable information regarding COVID-19 is important for governmental authorities during the pandemic. Lastly, establishing appropriate and low-threshold interventions to support mentally burdened people is crucial.

### Declaration of competing interest

The authors declare that they have no competing interests.

## Funding

This study was supported by the Essen University Medicine Foundation. The funder had no role in the design and conduct of the study; management, collection, analysis and interpretation of the data; preparation, review or approval of the manuscript; and decision to submit the manuscript for publication.

## References

- Zhu N, Zhang D, Wang W *et al*. A novel coronavirus from patients with pneumonia in China, 2019. *N Engl J Med* 2020;**382**:727–33. doi: 10.1056/NEJMoa2001017.
- World Health Organization (WHO). *COVID-19 Case Numbers*. 2020a. <https://who.sprinklr.com/>. (15 June 2020, date last accessed).
- World Health Organization (WHO). *WHO Director-General's opening remarks at the media briefing on COVID-19 - 11 March 2020*. 2020b. <https://www.who.int/dg/speeches/detail/who-director-general-s-opening-remarks-at-the-media-briefing-on-COVID-19---11-march-2020> (15 June 2020, date last accessed).
- Sanders JM, Monogue ML, Jodlowski TZ *et al*. Pharmacologic treatments for coronavirus disease 2019 (COVID-19): a review. *JAMA* 2020;**323**:1824–36. doi: 10.1001/jama.2020.6019.
- Brooks SK, Webster RK, Smith LE *et al*. The psychological impact of quarantine and how to reduce it: rapid review of the evidence. *Lancet* 2020;**395**:912–20. doi: 10.1016/S0140-6736(20)30460-8.
- Emami A, Javanmardi F, Pirbonyeh N *et al*. Prevalence of underlying diseases in hospitalized patients with COVID-19: a systematic review and meta-analysis. *Arch Acad Emerg Med* 2020;**8**:e35. doi: 10.22037/aaem.v8i1.600.
- Maddaloni E, Buzzetti R. Covid-19 and diabetes mellitus: unveiling the interaction of two pandemics. *Diabetes Metab Res Rev* 2020;e33213321. doi: 10.1002/dmrr.3321.
- South AM, Diz DI, Chappell MC *et al*. COVID-19, ACE2, and the cardiovascular consequences. *Am J Physiol Heart Circ Physiol* 2020;**318**:H1084–90. doi: 10.1152/ajpheart.00217.2020.
- Rajkumar RP. COVID-19 and mental health: a review of the existing literature. *Asian J Psychiatr* 2020;**52**:102066. doi: 10.1016/j.ajp.2020.102066.
- World Health Organization (WHO). *Substantial Investment Needed To Avert Mental Health Crisis*. <https://www.who.int/news-room/detail/14-05-2020-substantial-investment-needed-to-avert-mental-health-crisis> (19 May 2020, date last accessed).
- Kang L, Ma S, Chen M *et al*. Impact on mental health and perceptions of psychological care among medical and nursing staff in Wuhan during the 2019 novel coronavirus disease outbreak: a cross-sectional study. *Brain Behav Immun* 2020;**87**:11–17. doi: 10.1016/j.bbi.2020.03.028.
- Lai J, Ma S, Wang Y *et al*. Factors associated with mental health outcomes among health care workers exposed to coronavirus disease 2019. *JAMA Netw Open* 2020;**3**:e203976. doi: 10.1001/jamanetworkopen.2020.3976.
- Depoux A, Martin S, Karafillakis E *et al*. The pandemic of social media panic travels faster than the COVID-19 outbreak. *J Travel Med* 2020;**27**. doi: 10.1093/jtm/taaa031.
- Garfin DR, Silver RC, Holman EA. The novel coronavirus (COVID-2019) outbreak: amplification of public health consequences by media exposure. *Health Psychol* 2020;**39**:355–7. doi: 10.1037/hea0000875.
- Teufel M, Schweda A, Dorrie N *et al*. Not all world leaders use twitter in response to the COVID-19 pandemic: impact of the way of Angela Merkel on psychological distress, behaviour and risk perception. *J Public Health (Oxf)* 2020. doi: 10.1093/pubmed/fdaa060.
- Huang Y, Zhao N. Generalized anxiety disorder, depressive symptoms and sleep quality during COVID-19 outbreak in China: a web-based cross-sectional survey. *Psychiatry Res* 2020;**288**:112954. doi: 10.1016/j.psychres.2020.112954.
- Holmes EA, O'Connor RC, Perry VH *et al*. Multidisciplinary research priorities for the COVID-19 pandemic: a call for action for mental health science. *Lancet Psychiatry* 2020;**7**:547–60. doi: 10.1016/S2215-0366(20)30168-1.
- Löwe B, Decker O, Müller S *et al*. Validation and standardization of the generalized anxiety disorder screener (GAD-7) in the general population. *Med Care* 2008;**46**:266–74. doi: 10.1097/MLR.0b013e318160d093.
- Löwe B, Kroenke K, Grafe K. Detecting and monitoring depression with a two-item questionnaire (PHQ-2). *J Psychosom Res* 2005;**58**:163–71. doi: 10.1016/j.jpsychores.2004.09.006.
- Hinz A, Mitchell AJ, Degi CL *et al*. Normative values for the distress thermometer (DT) and the emotion thermometers (ET), derived from a German general population sample. *Qual Life Res* 2019;**28**:277–82. doi: 10.1007/s11136-018-2014-1.
- Hinz A, Klein AM, Brähler E *et al*. Psychometric evaluation of the generalized anxiety disorder screener GAD-7, based on a large German general population sample. *J Affect Disord* 2017;**210**:338–44. doi: 10.1016/j.jad.2016.12.012.
- Spitzer RL, Kroenke K, Williams JB *et al*. A brief measure for assessing generalized anxiety disorder: the GAD-7. *Arch Intern Med* 2006;**166**:1092–7. doi: 10.1001/archinte.166.10.1092.
- Spangenberg L, Brähler E, Glaesmer H. Wie gut eignen sich verschiedene Versionen des Depressionsmoduls des patient health questionnaires zur Identifikation depressiver Personen in der Allgemeinbevölkerung? *Z Psychosom Med Psychother* 2012;**55**:3–10. doi: 10.13109/zptm.2012.58.1.3.
- Sell TK, Boddie C, McGinty EE *et al*. Media messages and perception of risk for Ebola virus infection, United States. *Emerg Infect Dis* 2017;**23**:108–11. doi: 10.3201/eid2301.160589.
- Wang C, Pan R, Wan X *et al*. A longitudinal study on the mental health of general population during the COVID-19 epidemic in China. *Brain Behav Immun* 2020;**87**:40–48. doi: 10.1016/j.bbi.2020.04.028.
- Bäuerle A, Skoda EM, Dorrie N *et al*. Psychological support in times of COVID-19: the Essen community-based CoPE concept. *J Public Health (Oxf)* 2020b. doi: 10.1093/pubmed/fdaa053.
- Liu S, Yang L, Zhang C *et al*. Online mental health services in China during the COVID-19 outbreak. *Lancet Psychiatry* 2020;**7**:e17–8. doi: 10.1016/S2215-0366(20)30077-8.
- Bäuerle A, Graf J, Jansen C *et al*. An e-mental health intervention to support burdened people in times of the COVID-19 pandemic: CoPE it. *J Public Health (Oxf)* 2020a. doi: 10.1093/pubmed/fdaa058.
- Nulty DD. The adequacy of response rates to online and paper surveys: what can be done? *Assess Eval High Educ* 2008;**33**:301–14. doi: 10.1080/02602930701293231.
